# Supplementary material for: One-pot three-component domino protocol for the synthesis of novel pyrano[2,3-d]pyrimidines as antimicrobial and anti-biofilm agents
Source: Royal Society of Chemistry journal article supplement (doi:10.1039/c5ob00693g), 2015-01-01
Supplement: c5ob00693g1.pdf [file c5ob00693g1.pdf]

## One-pot three-component domino protocol for the synthesis of novel pyrano[2,3-*d*]pyrimidines as antimicrobial and anti-biofilm agents

Lingala Suresh<sup>a</sup>, Y. Poornachandra<sup>b</sup>, S. Kanakaraju<sup>a</sup>, G. V. P. Chandramouli<sup>a,\*</sup> and C. Ganesh Kumar<sup>b</sup>

<sup>a</sup> Department of Chemistry, National Institute of Technology, Warangal 506 004, Telangana, India.

<sup>b</sup> Medicinal Chemistry and Pharmacology Division, CSIR-Indian Institute of Chemical Technology,  
Uppal Road, Hyderabad 500 007, Telangana, India

\*E-mail: [gvpc2000@gmail.com](mailto:gvpc2000@gmail.com)

### SOME SELECTED SPECTRA (Supplementary information)

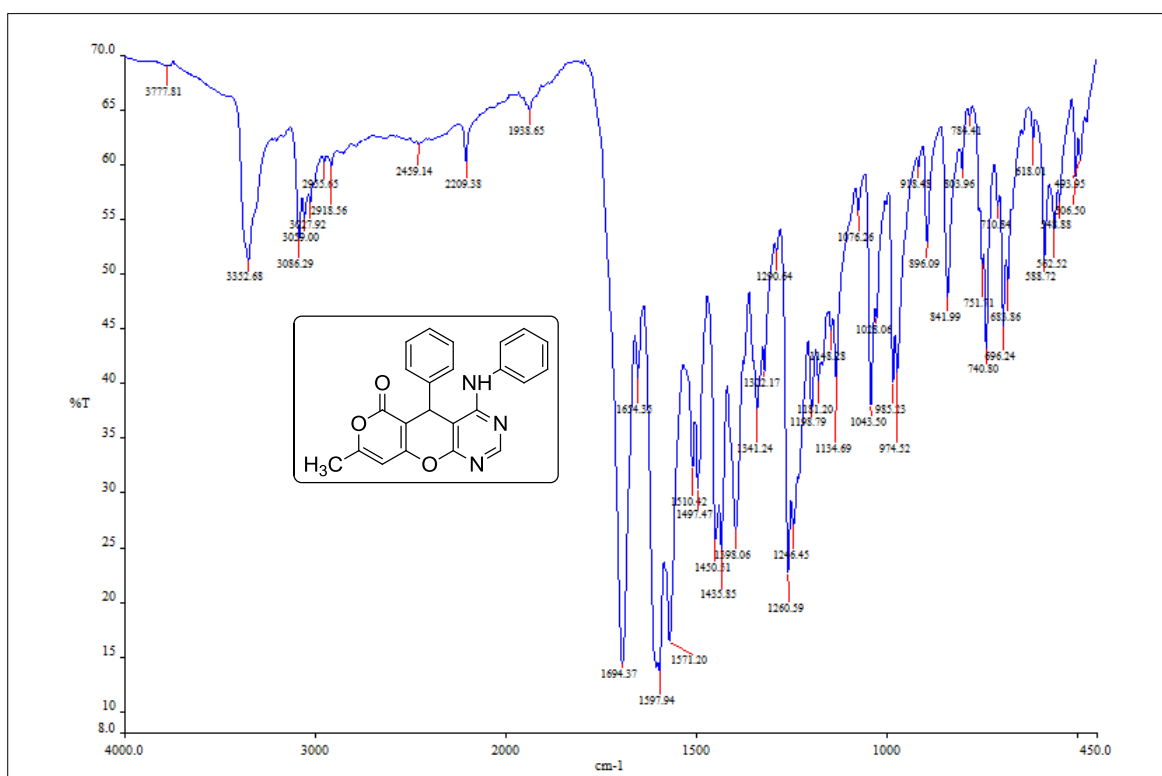

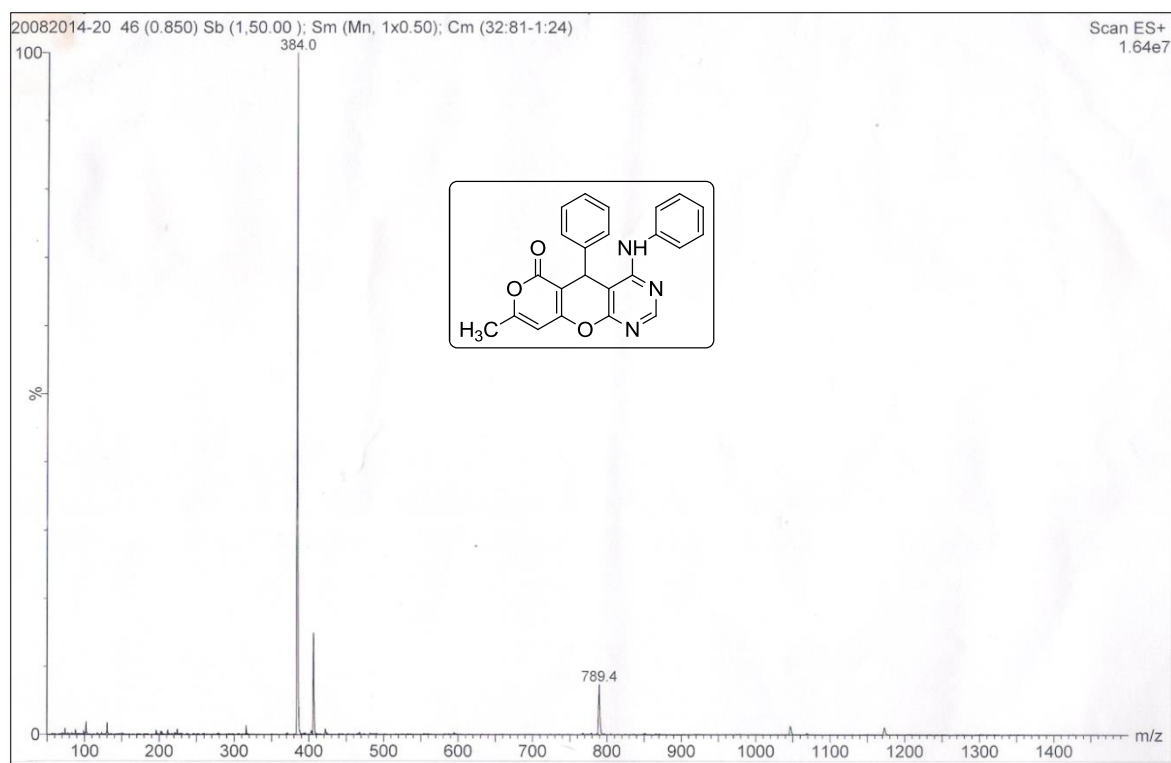

Mass Spectrum of compound **4a**

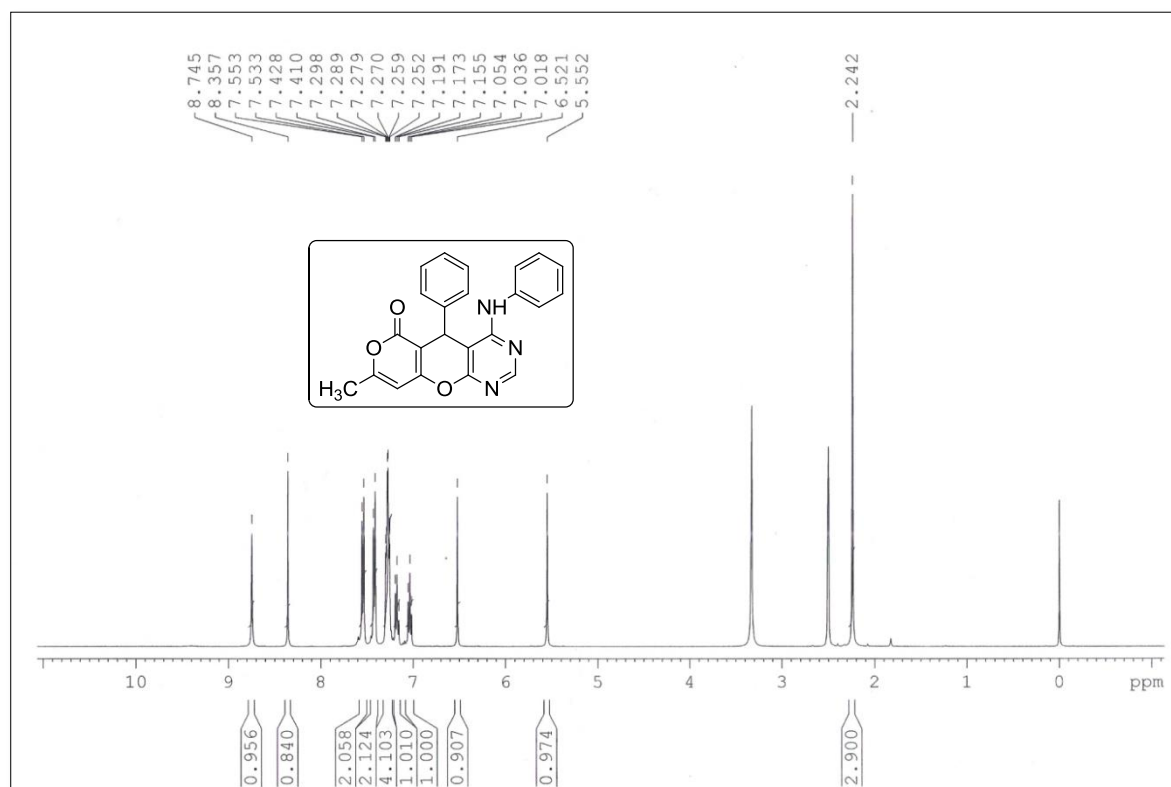

<sup>1</sup>H NMR Spectrum of compound **4a**

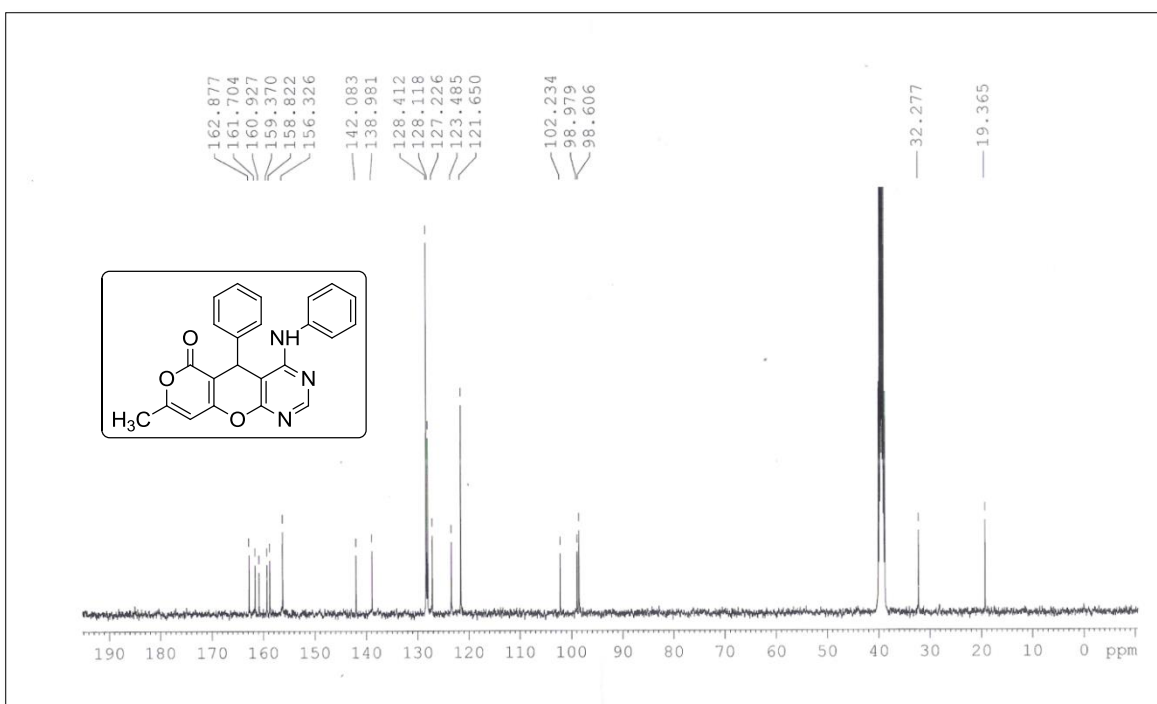

<sup>13</sup>C NMR Spectrum of compound **4a**

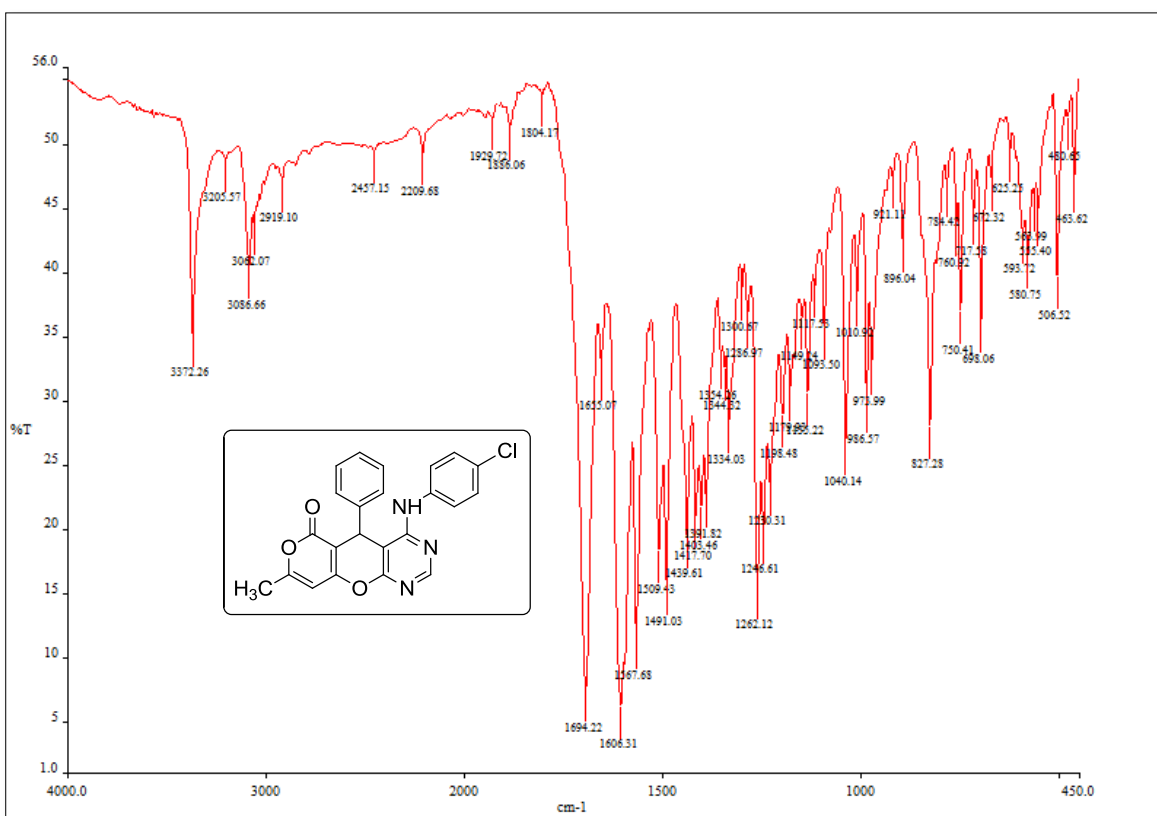

IR Spectrum of compound **4b**

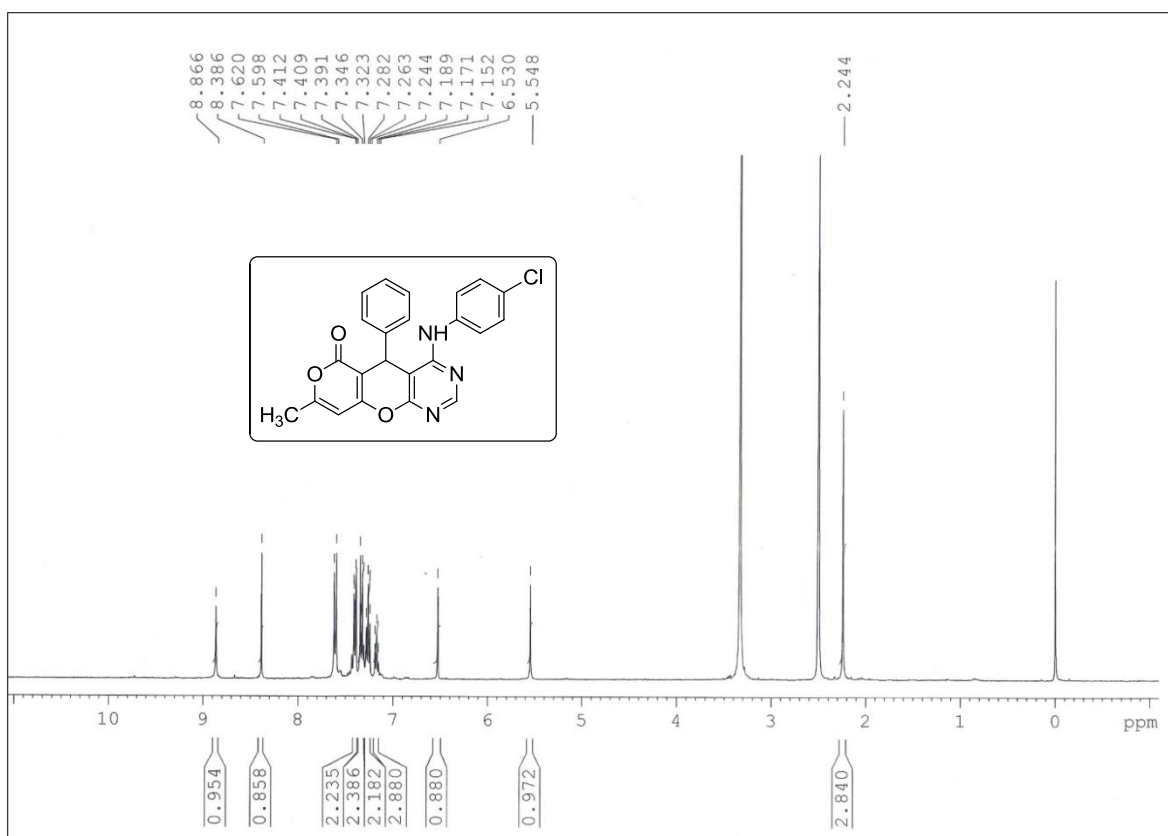

**<sup>1</sup>H NMR Spectrum of compound **4b****

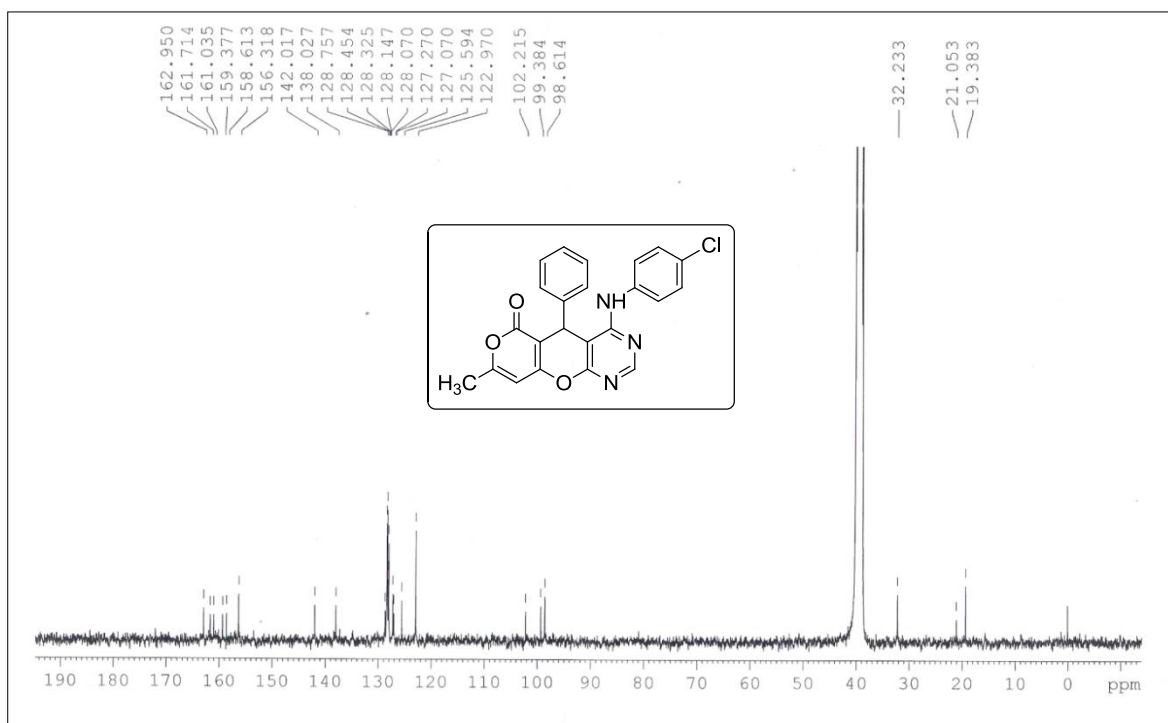

**<sup>13</sup>C NMR Spectrum of compound **4b****

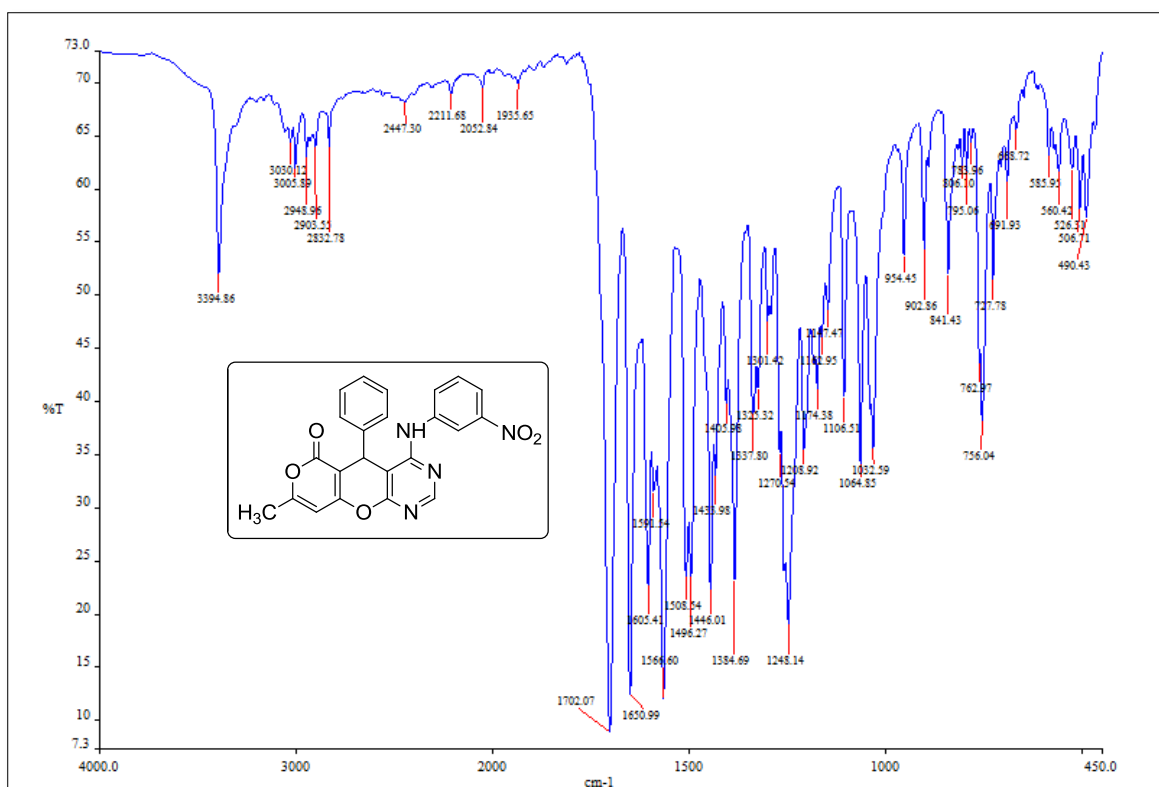

IR Spectrum of compound **4c**

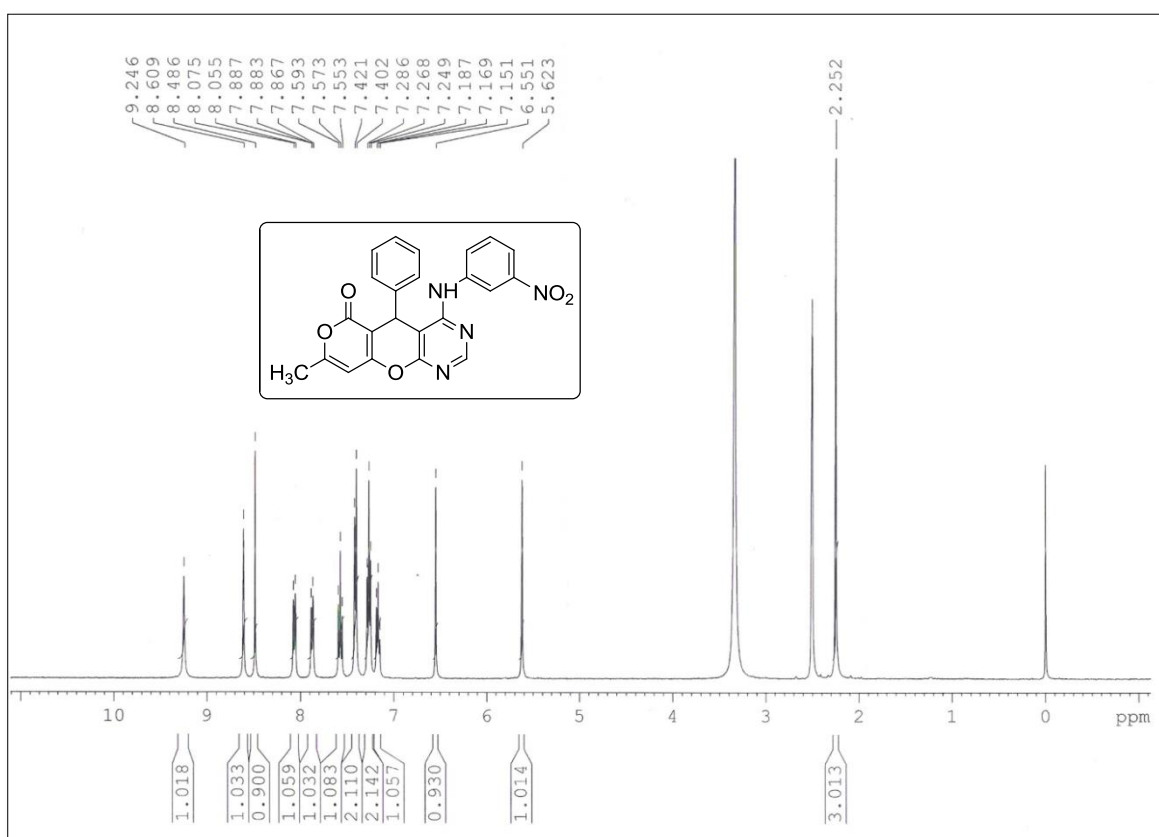

$^1\text{H}$  NMR Spectrum of compound **4c**

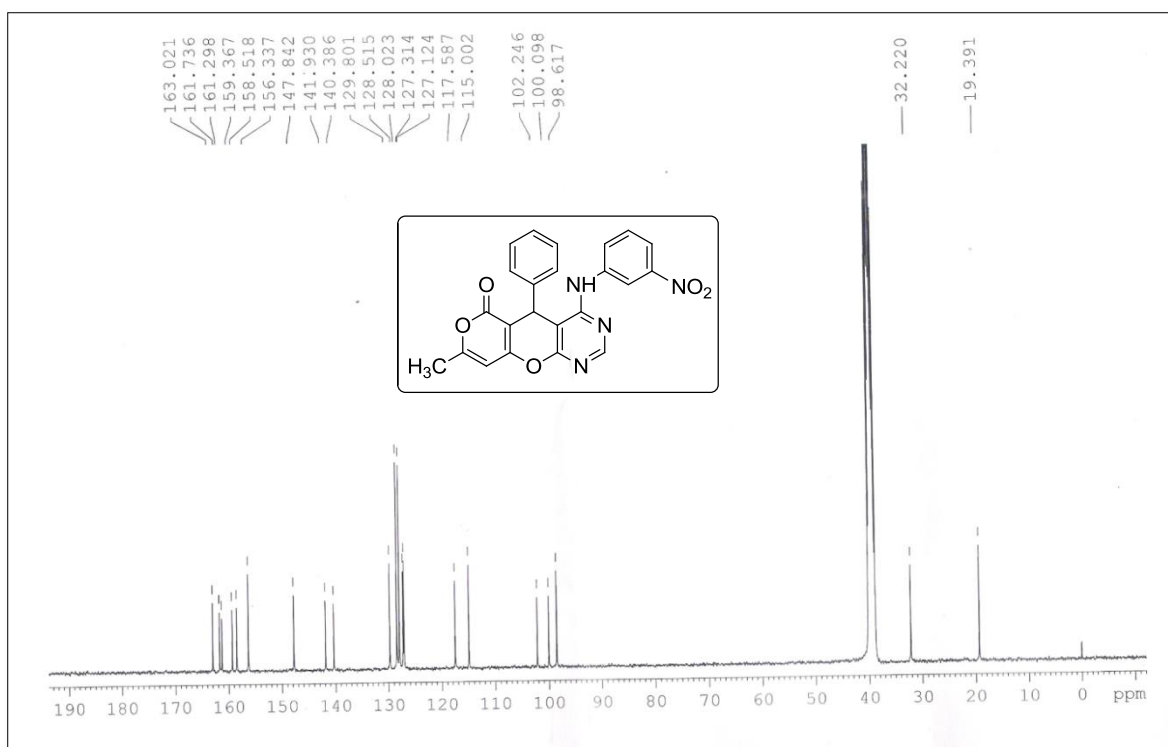

<sup>13</sup>C NMR Spectrum of compound **4c**

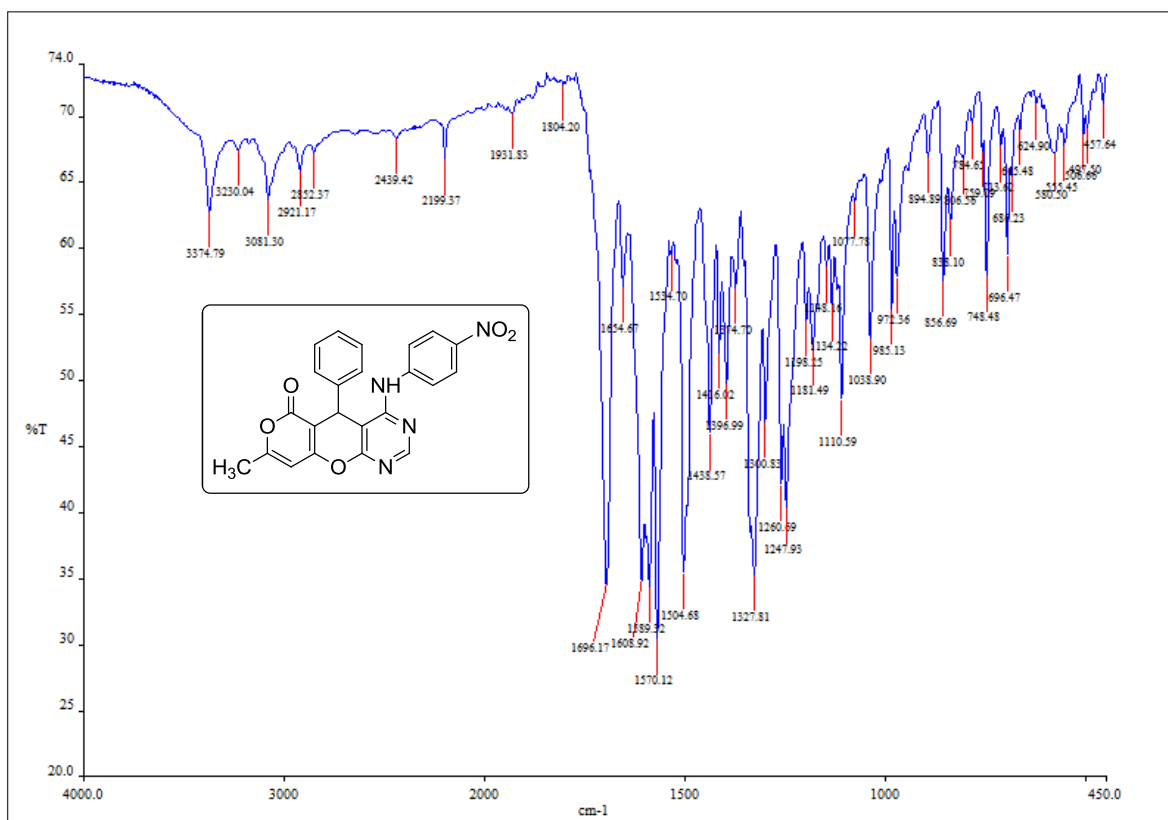

IR Spectrum of compound **4d**

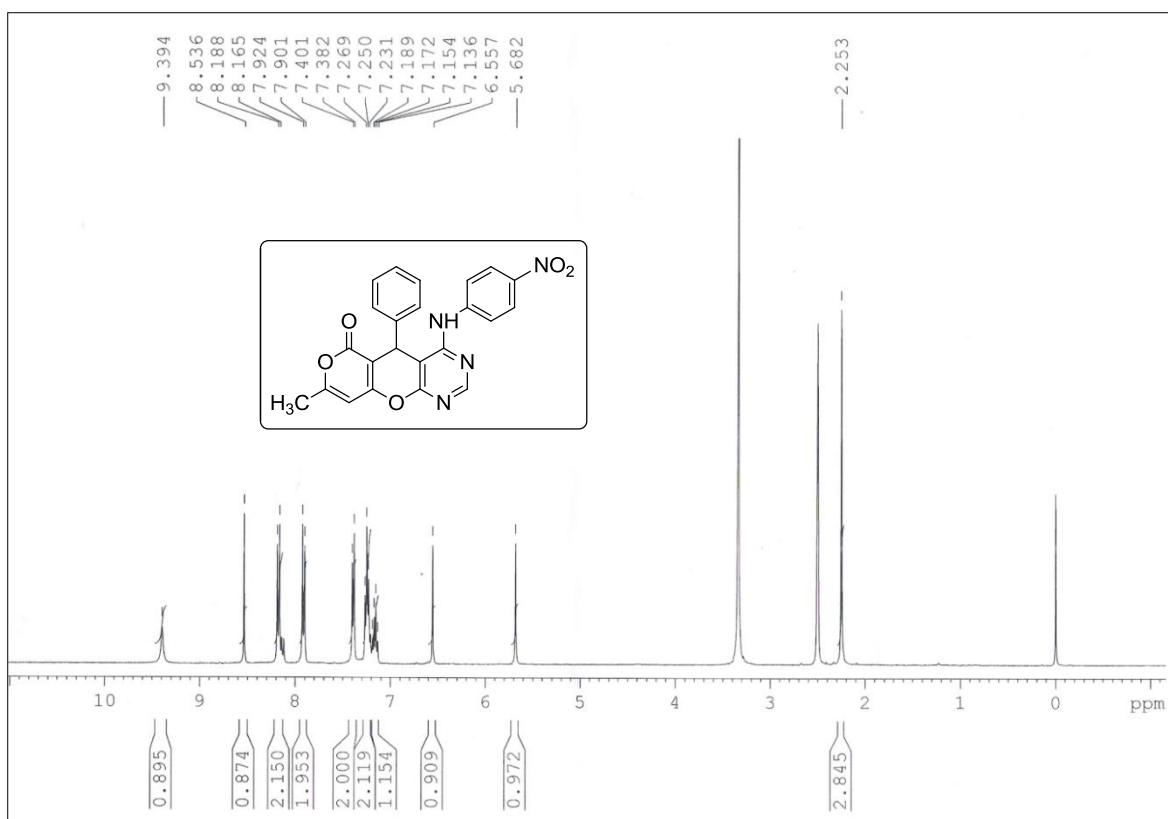

<sup>1</sup>H NMR Spectrum of compound **4d**

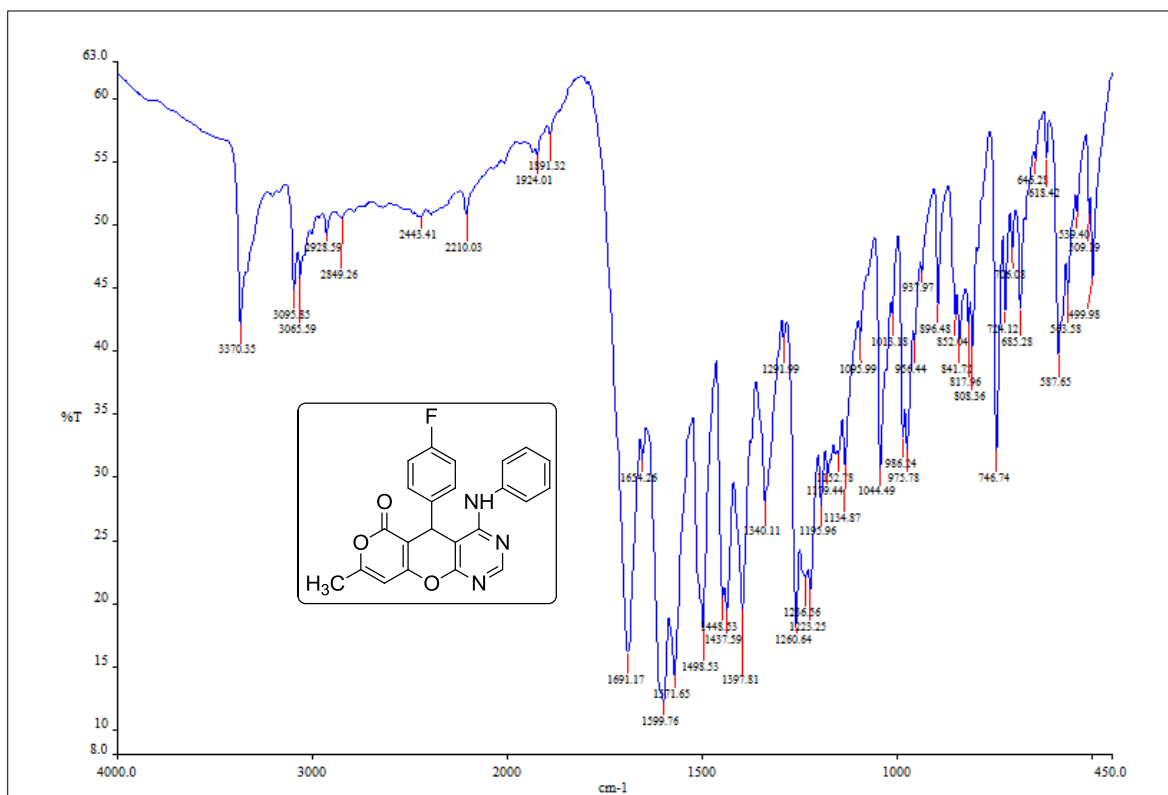

IR Spectrum of compound **4e**

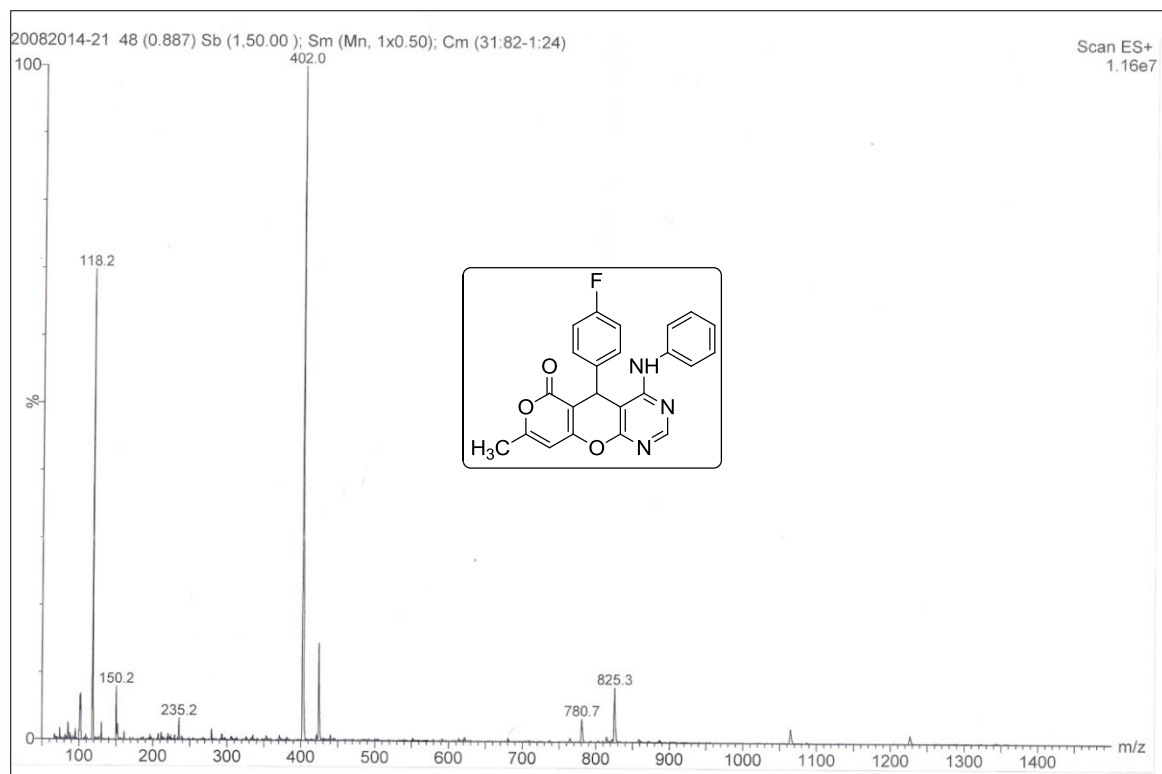

Mass Spectrum of compound **4e**

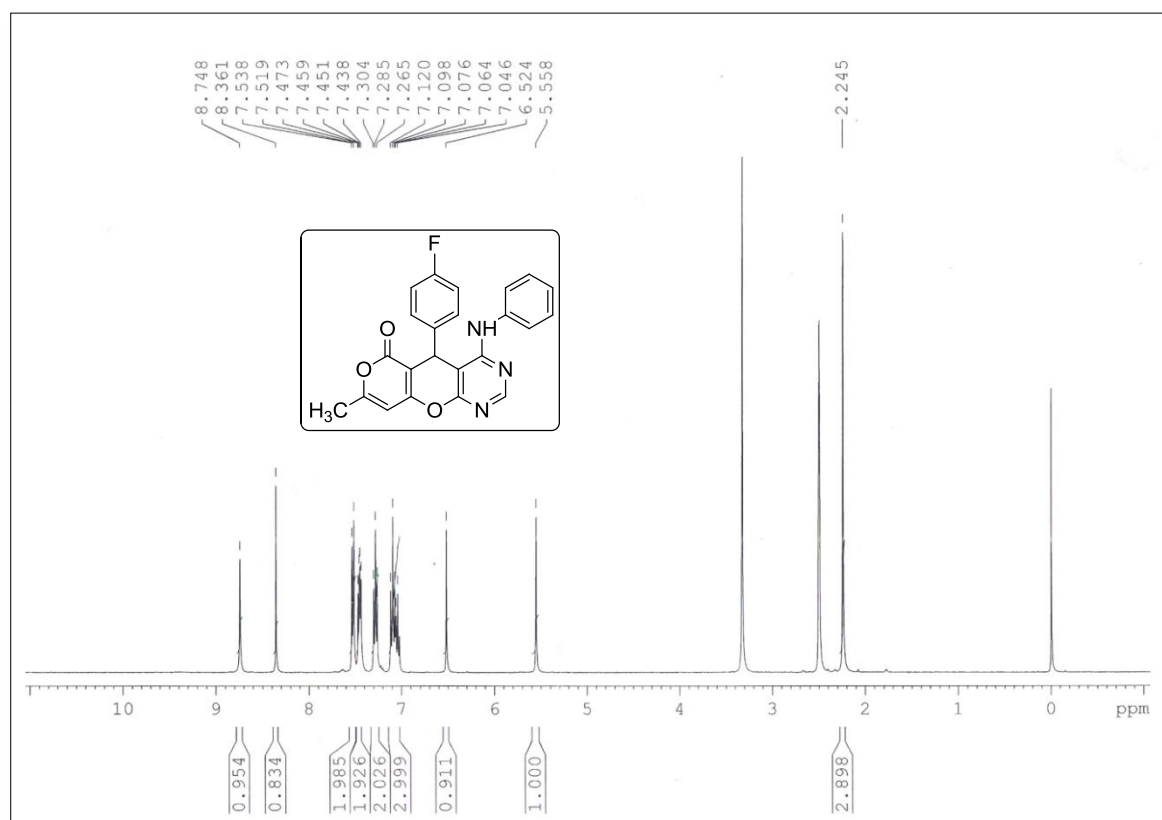

<sup>1</sup>H NMR Spectrum of compound **4e**



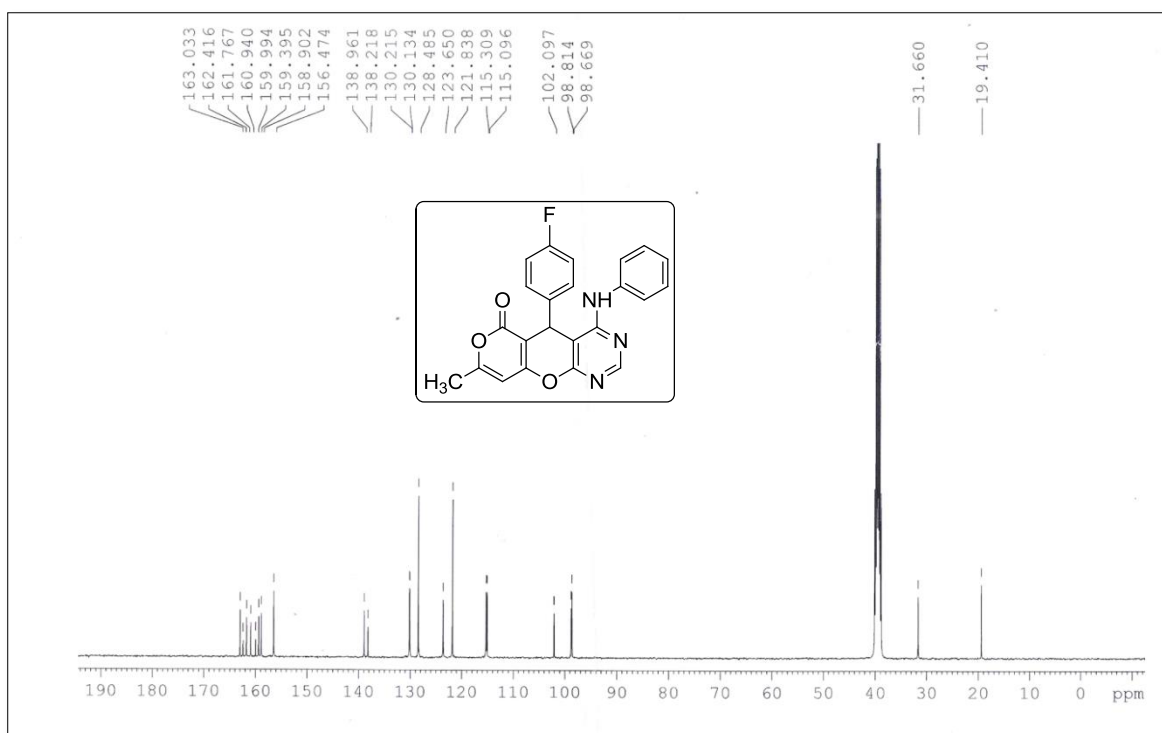

<sup>13</sup>C NMR Spectrum of compound **4e**

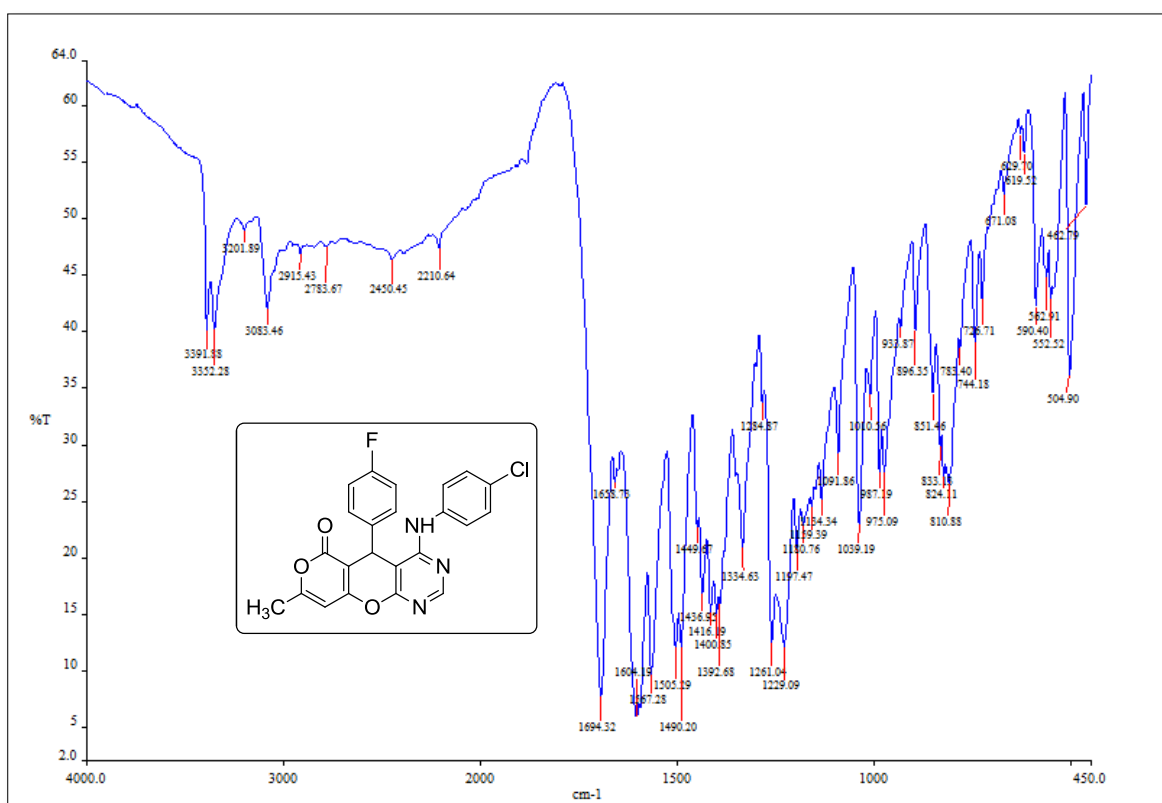

IR Spectrum of compound **4f**

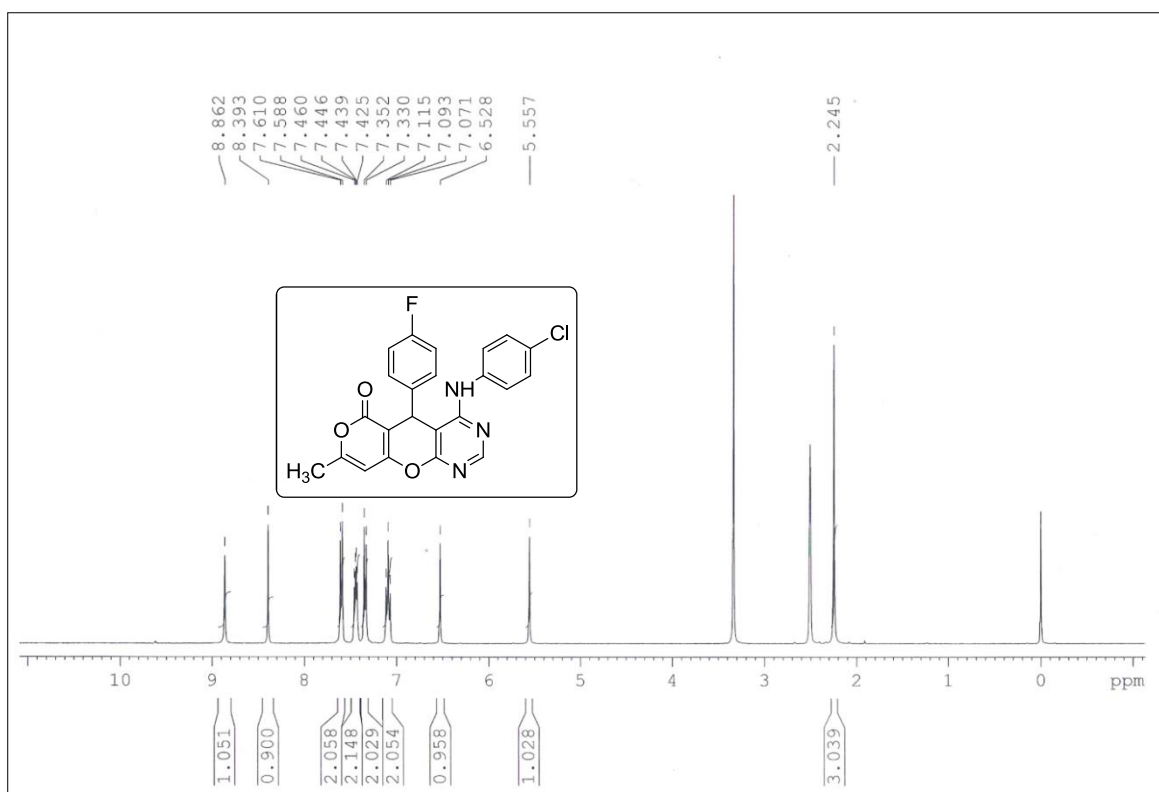

<sup>1</sup>H NMR Spectrum of compound 4f

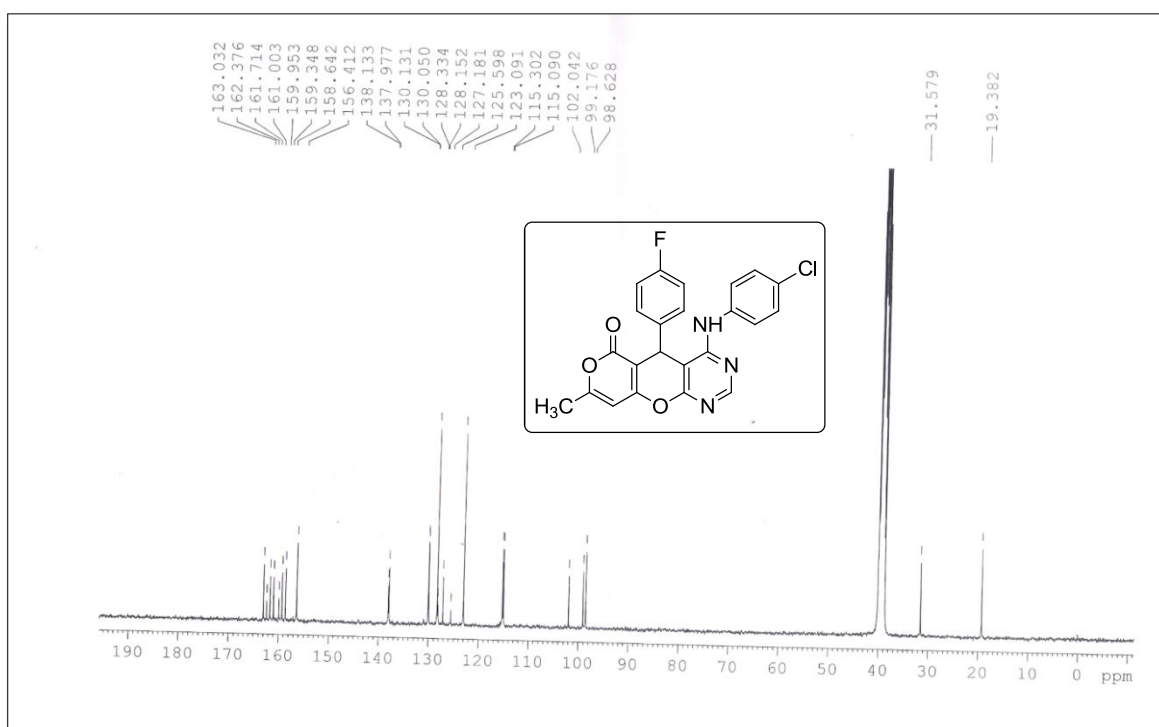

<sup>13</sup>C NMR Spectrum of compound 4f

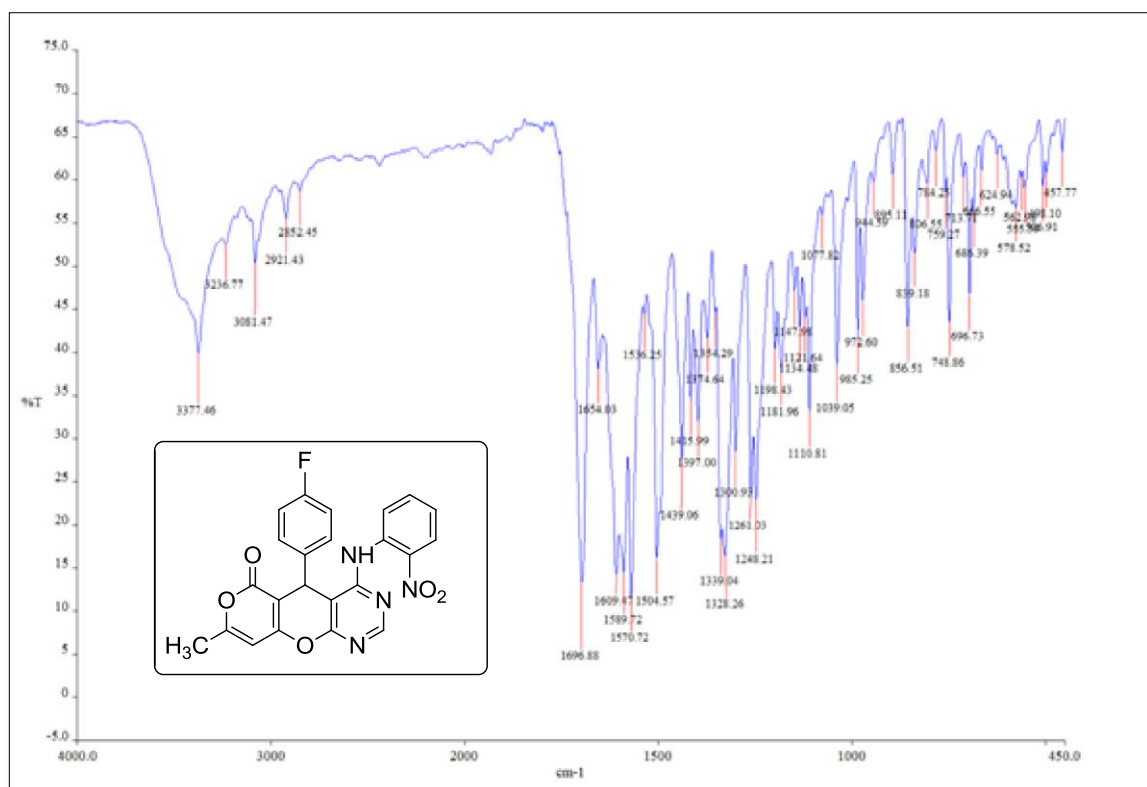

IR Spectrum of compound **4g**

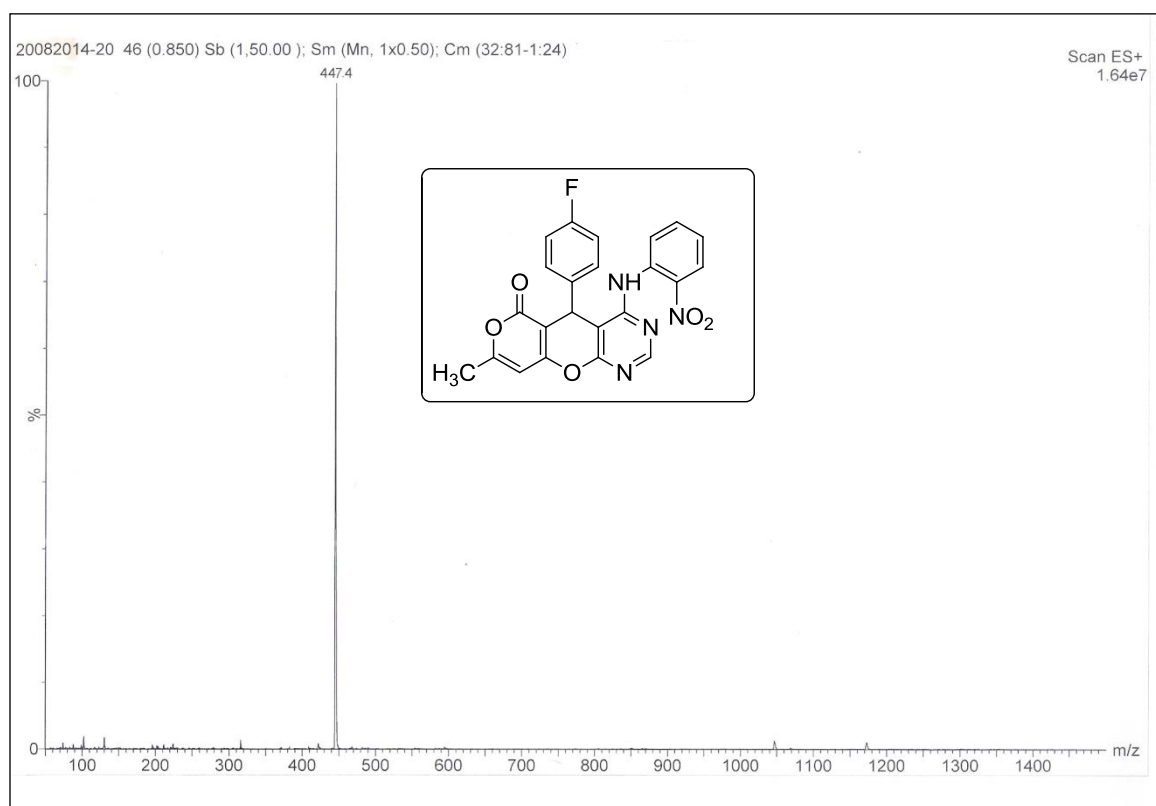

Mass Spectrum of compound **4g**

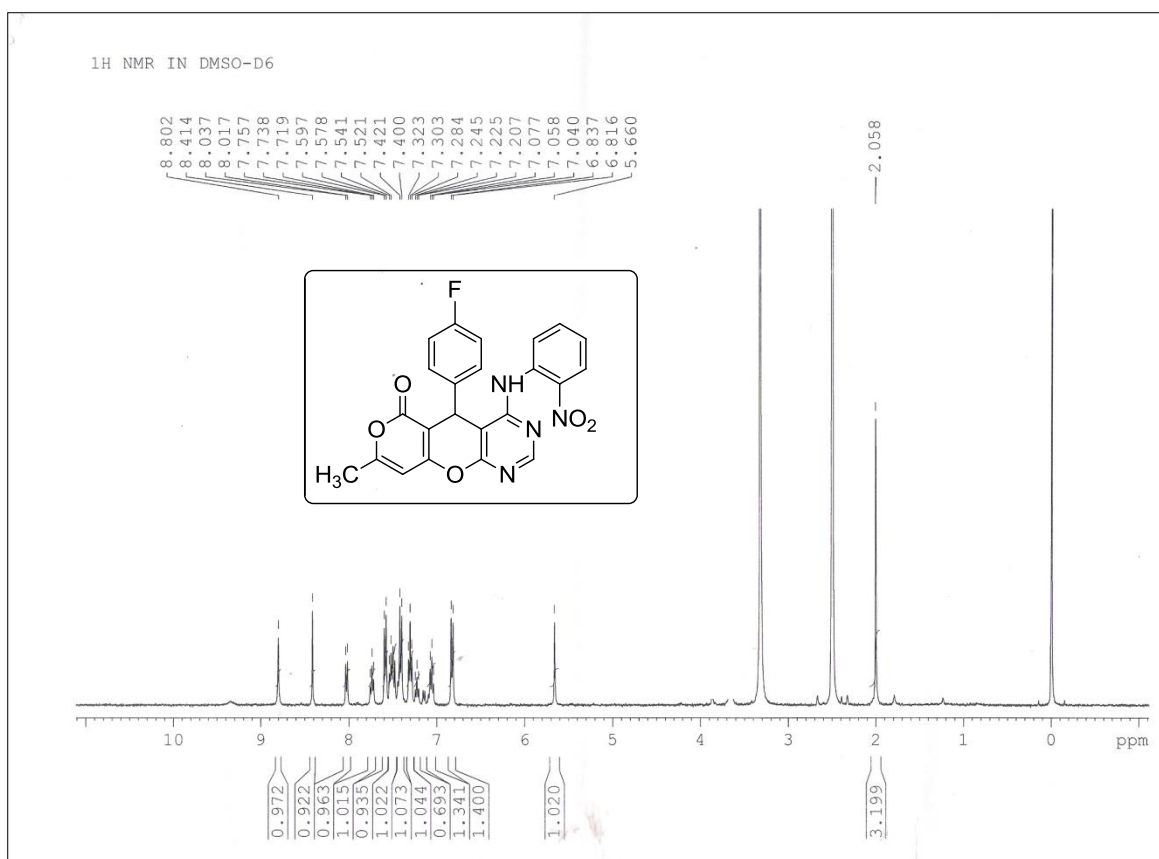

<sup>1</sup>H NMR Spectrum of compound **4g**

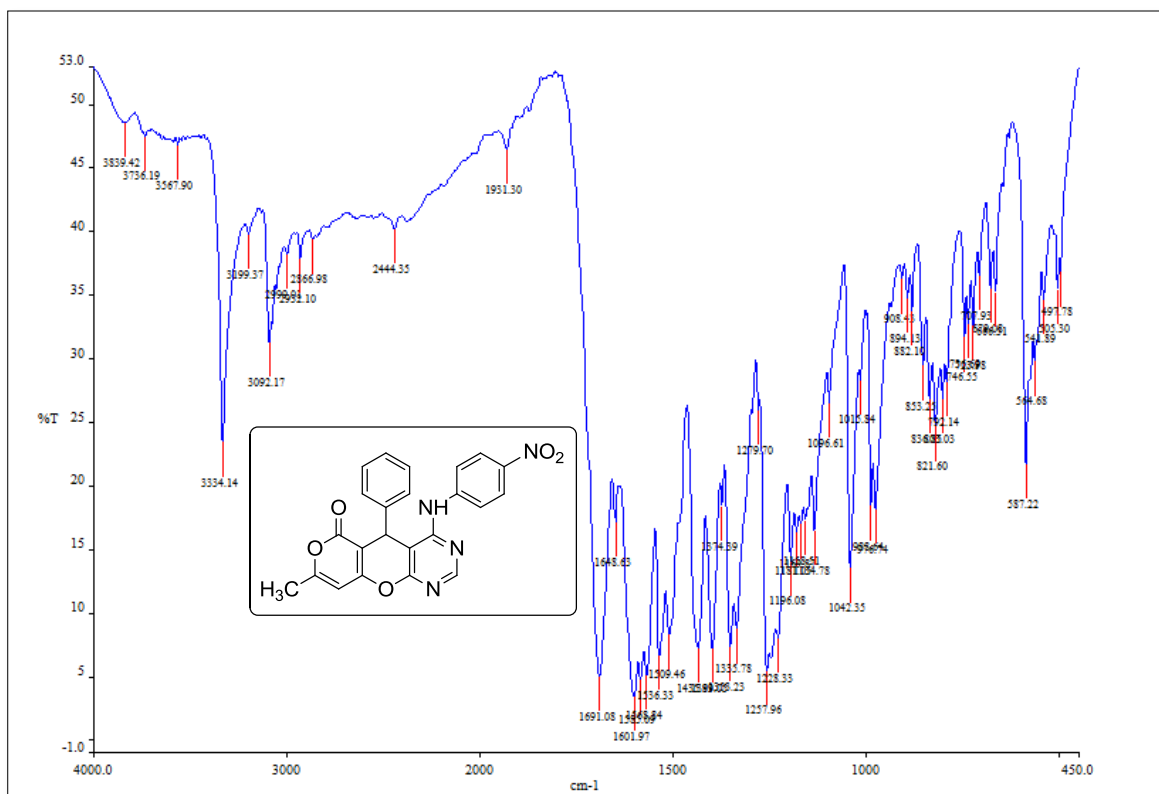

IR Spectrum of compound **4h**

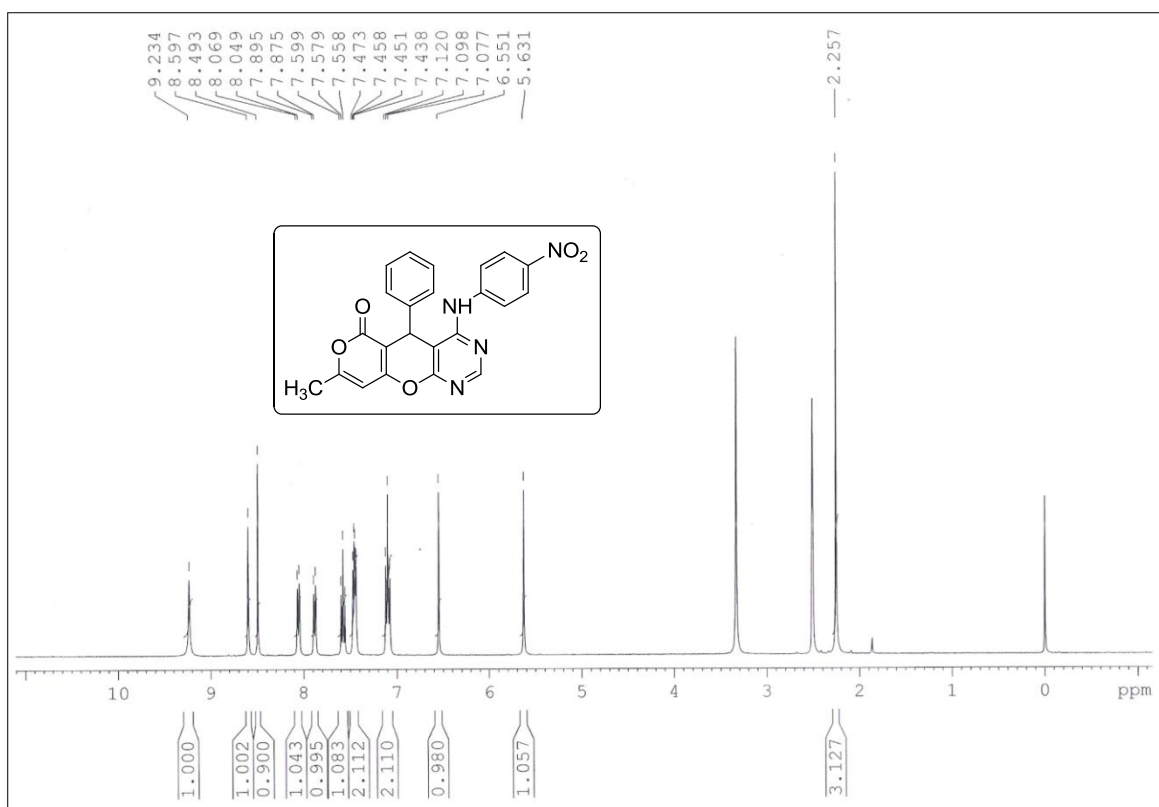

<sup>1</sup>H NMR Spectrum of compound 4h

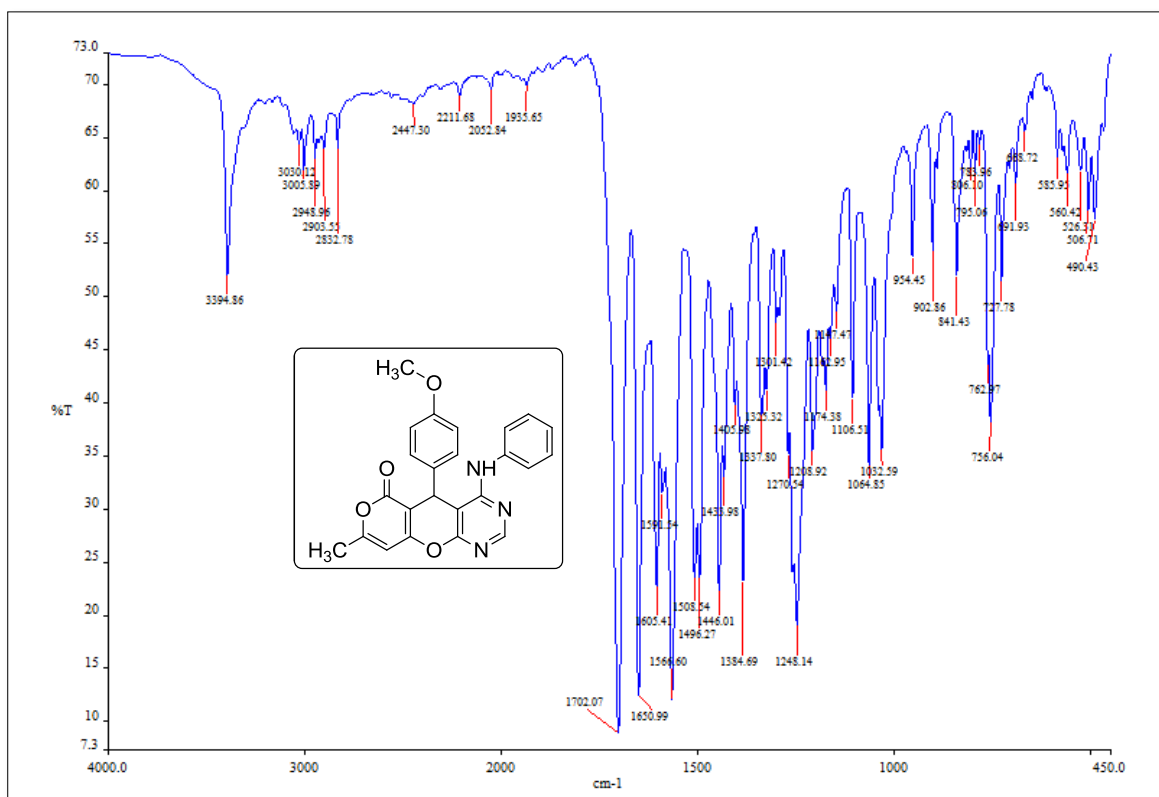

IR Spectrum of compound 4i

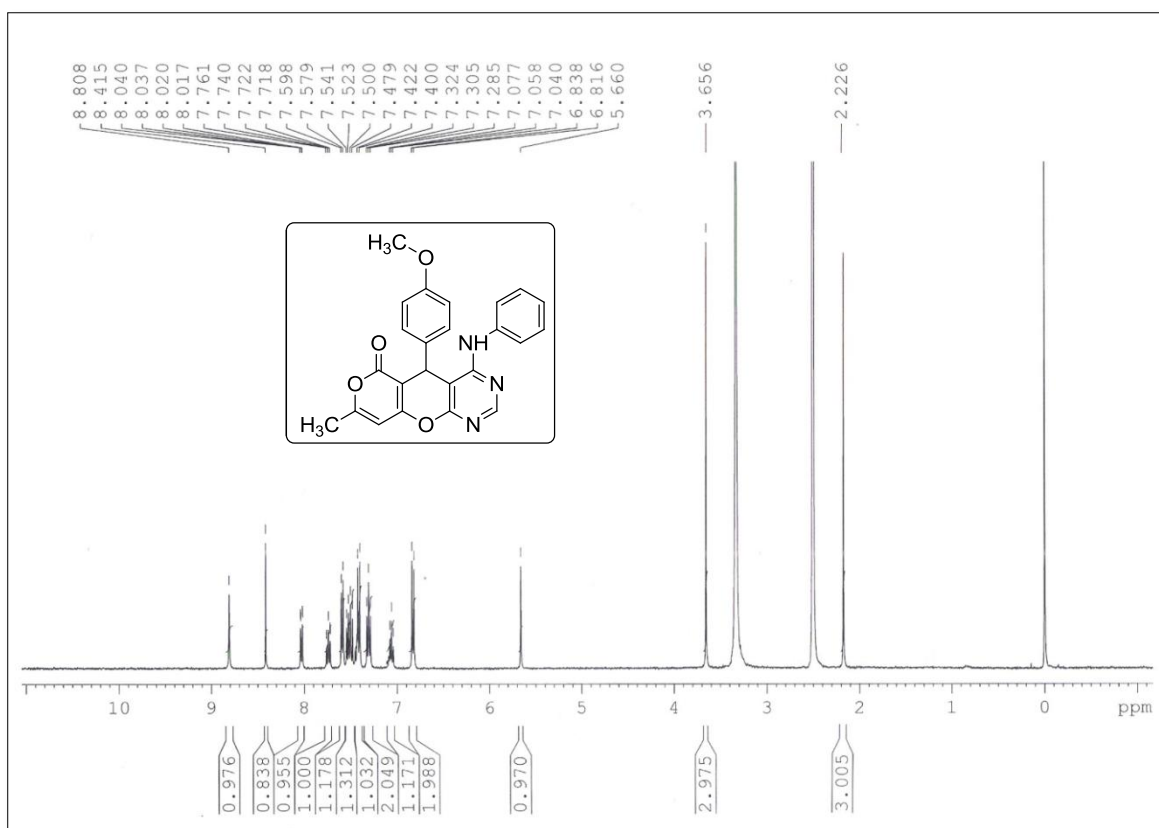

<sup>1</sup>H NMR Spectrum of compound **4i**

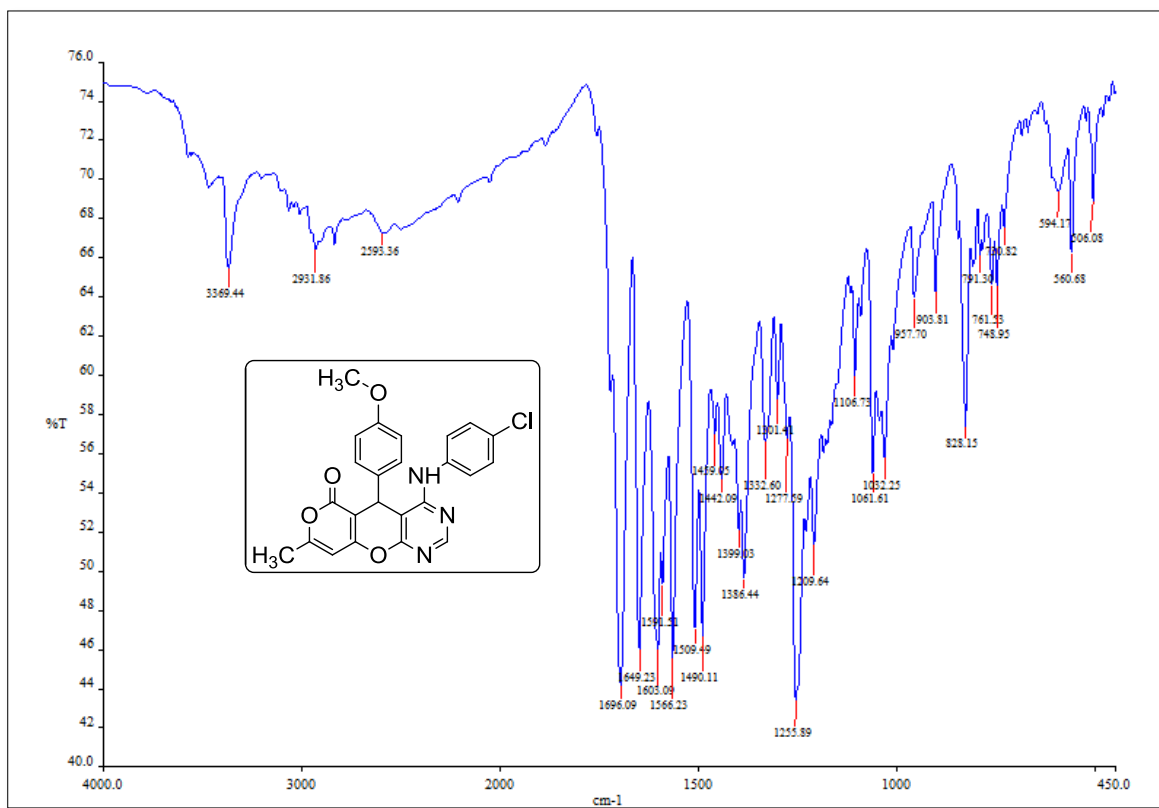

IR Spectrum of compound **4j**

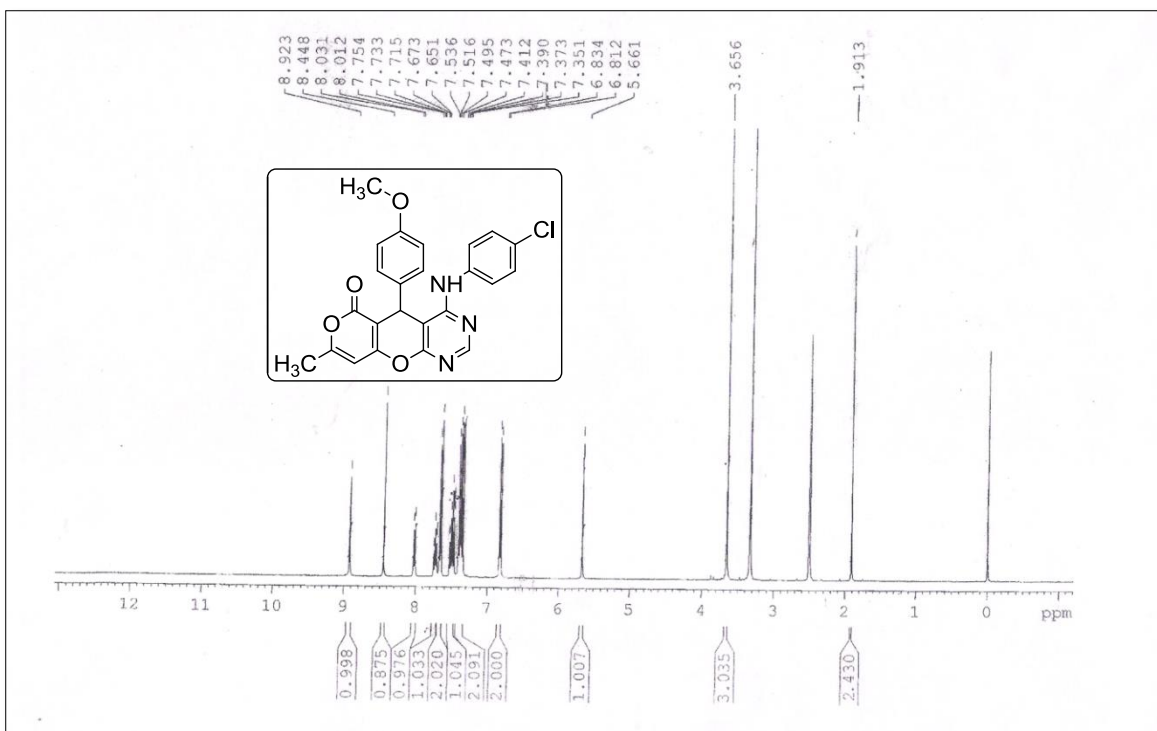

<sup>1</sup>H NMR Spectrum of compound **4j**

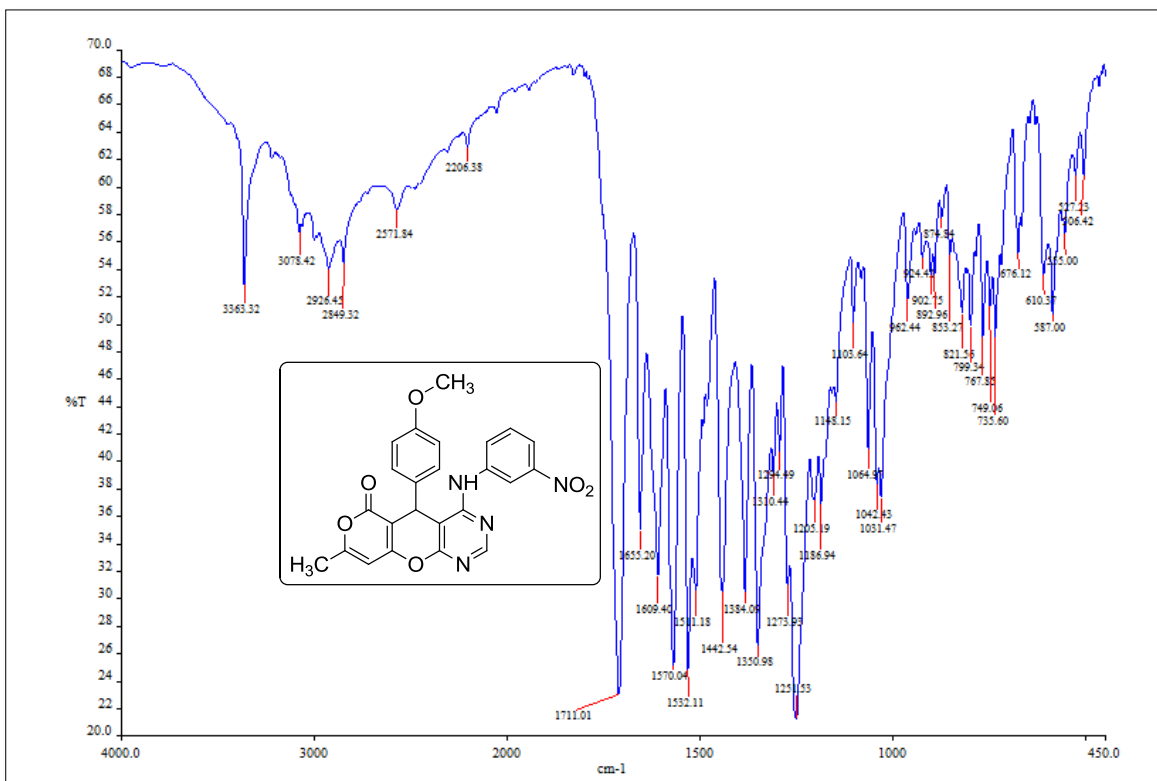

IR Spectrum of compound **4k**

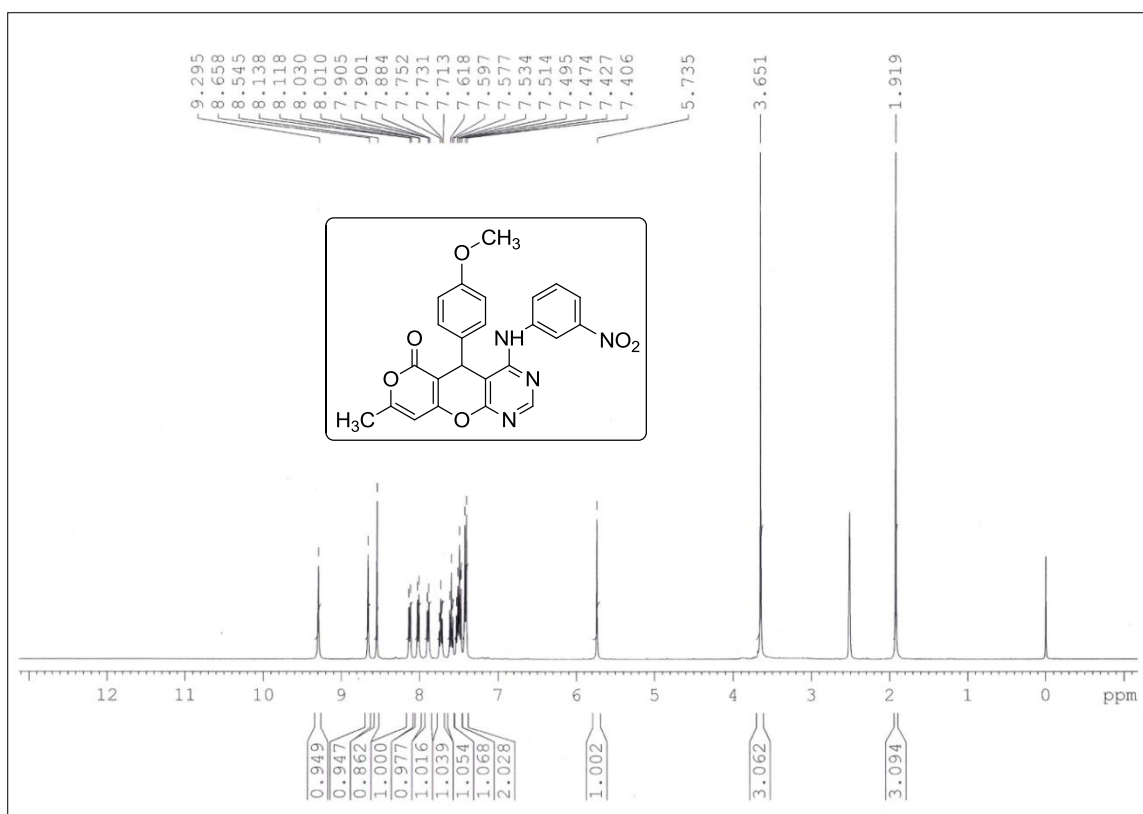

**<sup>1</sup>H NMR Spectrum of compound 4k**

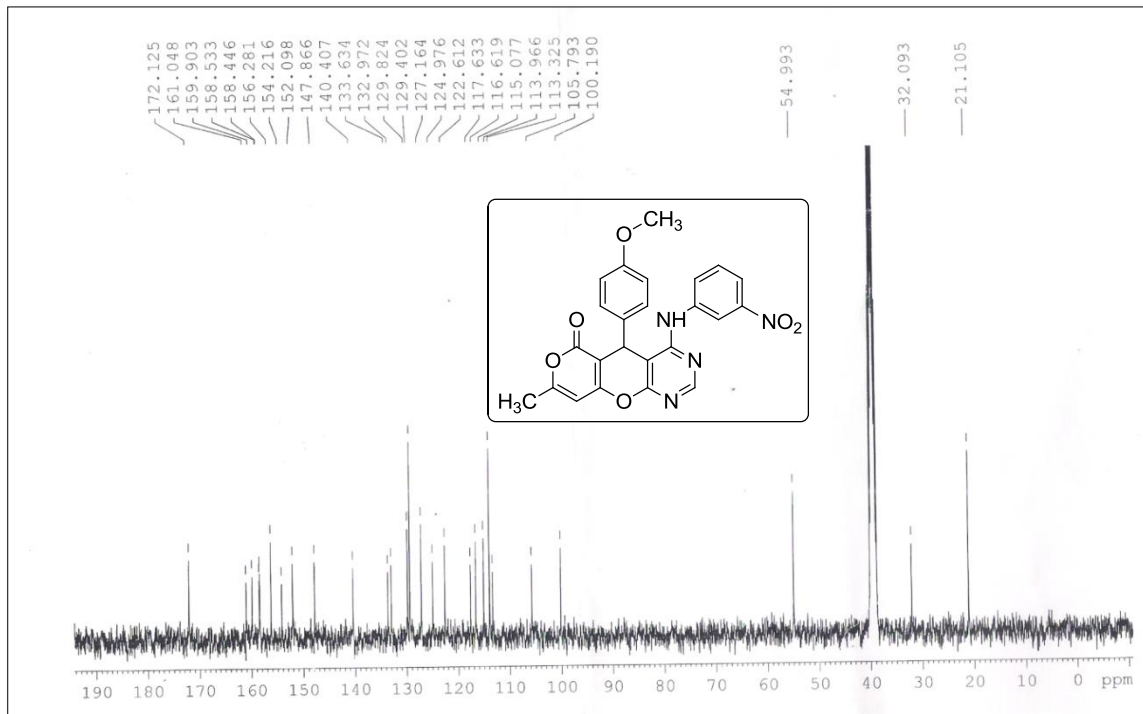

**<sup>13</sup>C NMR Spectrum of compound 4k**



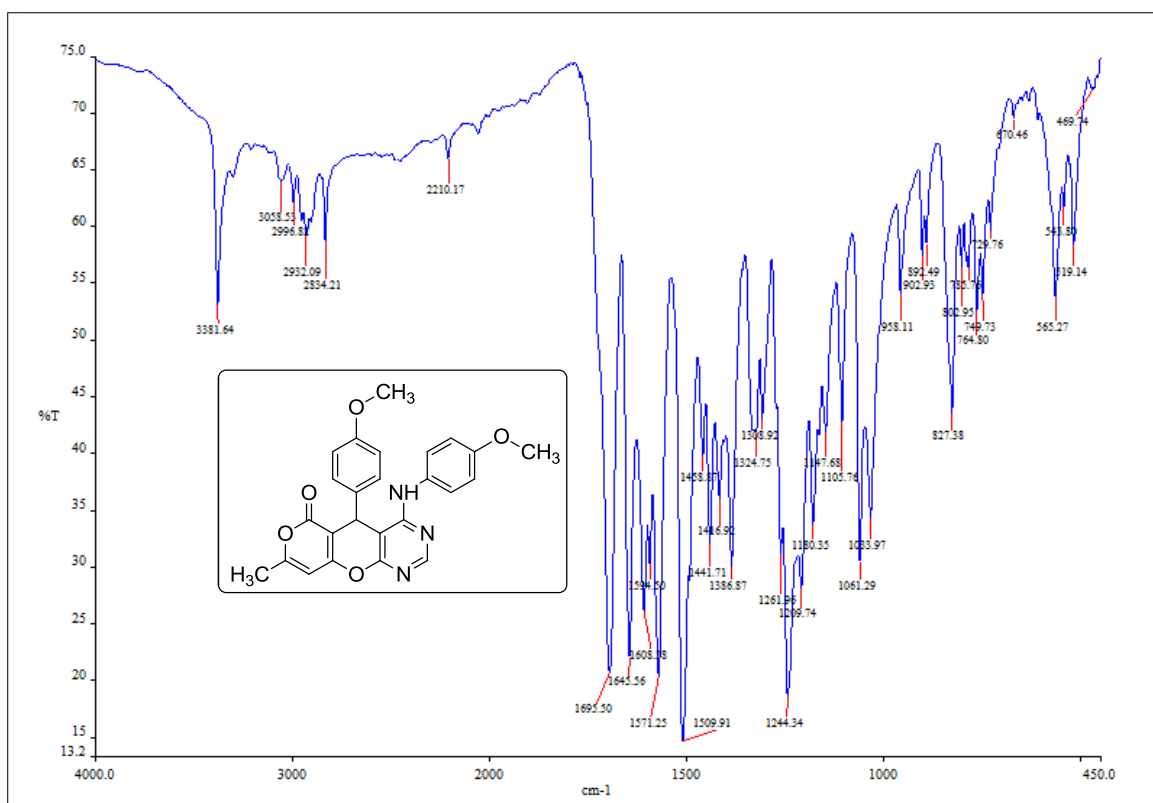

IR Spectrum of compound **4I**

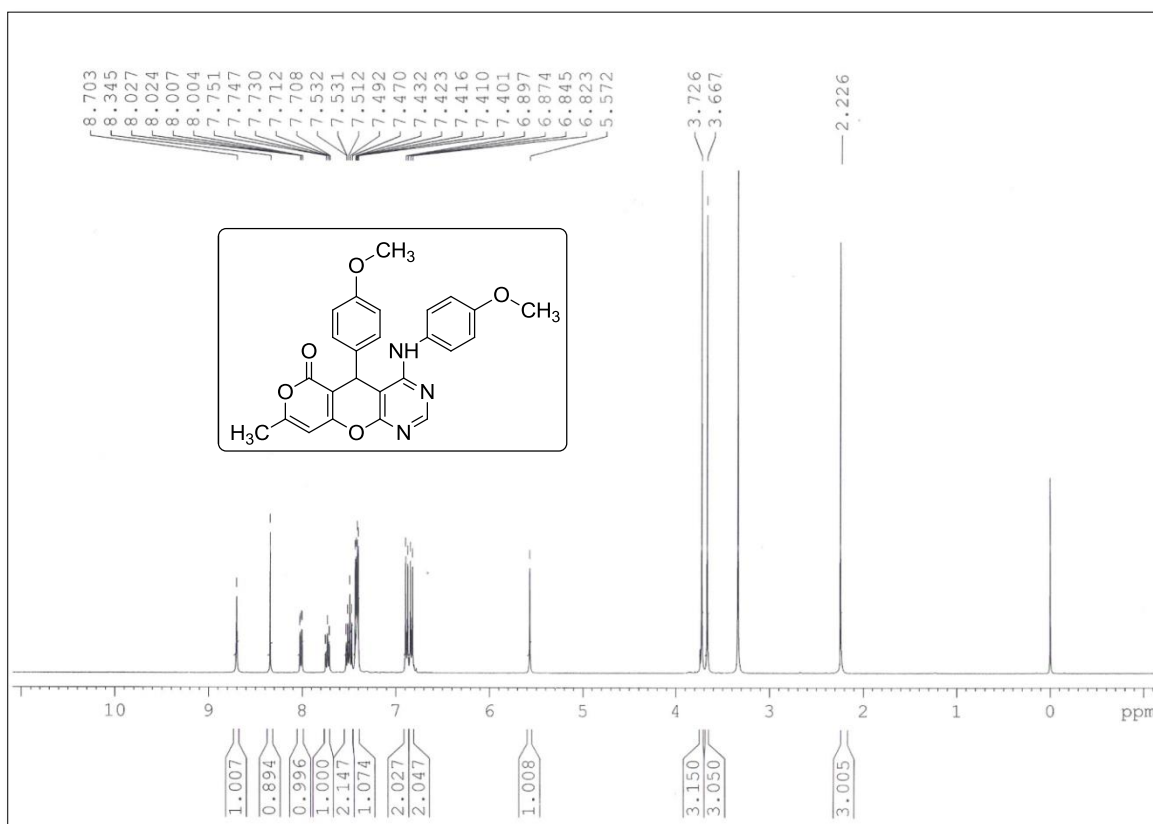

<sup>1</sup>H NMR Spectrum of compound **4I**

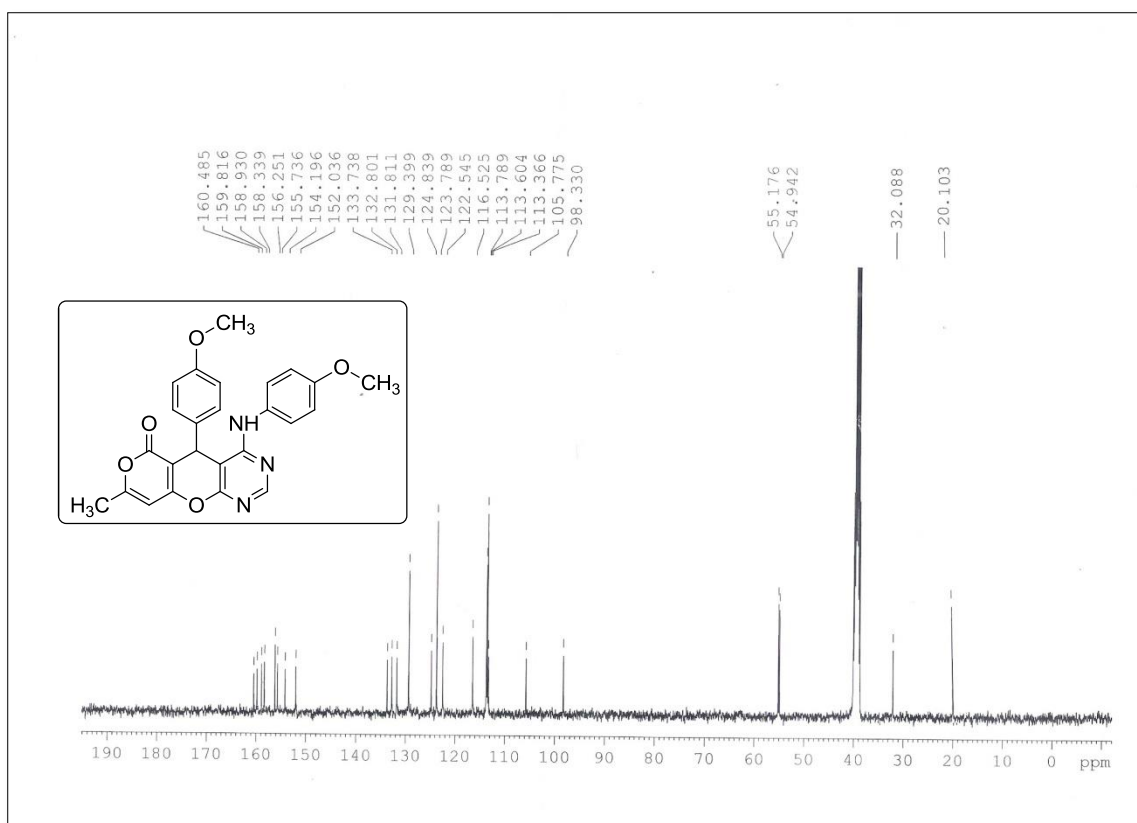

$^{13}\text{C}$  NMR Spectrum of compound **41**
